# Supplementary material for: Efficacy and safety of lipegfilgrastim versus pegfilgrastim in elderly patients with aggressive B cell non-Hodgkin lymphoma (B-NHL): results of the randomized, open-label, non-inferiority AVOID neutropenia study
Source: PubMed Central journal article supplement (PMC7981320; doi:10.1007/s00520-020-05711-7), 2020-09-17
Supplement: 520_2020_5711_MOESM1_ESM.pdf [file 520_2020_5711_MOESM1_ESM.pdf]

## **Supportive Care in Cancer**

# **Efficacy and safety of lipegfilgrastim versus pegfilgrastim in elderly patients with aggressive B-cell non-Hodgkin lymphoma (B-NHL): Results of the randomized, open label, non-inferiority AVOID neutropenia study neutropenia study**

**Article Type: Original Article**

**Corresponding Author: Hartmut Link, Prof. Dr.**

**Westpfalz-Klinikum, Klinik für Innere Medizin**

**Kaiserslautern, GERMANY**

**E-Mail: [hlink@kabelmail.de](mailto:hlink@kabelmail.de)**

**Supplementary Table S1.** Overview of key study inclusion and exclusion criteria

---

|                           |                                                                                                                                                                                                                                                                                                                                                                                                                                                                                                                                                                                                                                                                                                                                                                                                                                                                                                                                                                                                                                                                                                                            |
|---------------------------|----------------------------------------------------------------------------------------------------------------------------------------------------------------------------------------------------------------------------------------------------------------------------------------------------------------------------------------------------------------------------------------------------------------------------------------------------------------------------------------------------------------------------------------------------------------------------------------------------------------------------------------------------------------------------------------------------------------------------------------------------------------------------------------------------------------------------------------------------------------------------------------------------------------------------------------------------------------------------------------------------------------------------------------------------------------------------------------------------------------------------|
| <b>Inclusion criteria</b> | <p>Age 65–85 years</p> <p>Histological documentation of aggressive B-cell NHL</p> <p>Planned to receive systemic anticancer therapy with at least 6 cycles of R-CHOP21, according to local standards</p> <p>Eastern Cooperative Oncology Group [ECOG] performance status <math>\leq 2</math></p> <p>Life expectancy <math>\geq 3</math> months</p> <p>Adequate bone marrow, renal, and hepatic function as evidenced by the following within 14 days before start of chemotherapy:</p> <ul style="list-style-type: none"><li>• Absolute neutrophil count <math>\geq 1.5 \times 10^9/L</math></li><li>• Platelets <math>\geq 100 \times 10^9/L</math></li><li>• Hemoglobin <math>\geq 9.0</math> g/dL</li><li>• Serum creatinine <math>\leq 1.5</math> x upper limit of the normal range (ULN) OR glomerular filtration rate <math>\geq 30</math> mL/minute/1.73 m<sup>2</sup></li><li>• Aspartate aminotransferase (AST) and alanine aminotransferase (ALT) <math>\leq 2.5</math> x ULN</li><li>• Bilirubin <math>\leq 1.5</math> x ULN</li><li>• Alkaline phosphatase <math>\leq 2.5</math> x ULN</li></ul>               |
| <b>Exclusion criteria</b> | <p>Participation in a clinical study <math>\leq 30</math> days before randomization</p> <p>Chemotherapy within the past 3 months (a pre-phase to reduce tumor burden prior to start of R-CHOP was allowed)</p> <p>Any major surgical procedure, open biopsy, or significant traumatic injury within 28 days of start of chemotherapy</p> <p>Active cardiac disease or uncontrolled hypertension</p> <p>Arterial or venous thrombotic or embolic events such as cerebrovascular accident (including transient ischemic attacks), deep vein thrombosis or pulmonary embolism within 6 months before start of chemotherapy</p> <p>Ongoing infection or known history of human immunodeficiency virus (HIV) infection, tuberculosis, or chronic hepatitis B or C</p> <p>Evidence or history of bleeding diathesis</p> <p>Non-healing wound, ulcer, or bone fracture</p> <p>Renal failure requiring hemodialysis or peritoneal dialysis</p> <p>Treatment with lithium at screening or planned during the study</p> <p>Any other conditions that could interfere with study participation or evaluation of the study results</p> |

---

**Supplementary Table S2.** Summary of observed absolute neutrophil count ( $\times 10^9/L$ ) during cycle 1 (per-protocol population)

| <b>Absolute neutrophil count<br/>(<math>\times 10^9/L</math>)</b> | <b>Lipegfilgrastim<br/>(N=41)</b> | <b>Pegfilgrastim<br/>(N=44)</b> |
|-------------------------------------------------------------------|-----------------------------------|---------------------------------|
| Baseline, n                                                       | 41                                | 44                              |
| Mean (SD)                                                         | 8.0 (2.55)                        | 8.1 (2.67)                      |
| Median (range)                                                    | 8.2 (2.2–14.7)                    | 7.8 (3.2–13.8)                  |
| Day 1, n                                                          | 34                                | 35                              |
| Mean (SD)                                                         | 5.4 (2.43)                        | 6.1 (2.49)                      |
| Median (range)                                                    | 5.2 (1.2–13.5)                    | 5.6 (2.1–13.1)                  |
| Day 3, n                                                          | 40                                | 40                              |
| Mean (SD)                                                         | 8.6 (2.43)                        | 9.2 (5.75)                      |
| Median (range)                                                    | 8.5 (2.2–14.7)                    | 8.8 (3.2–40.7)                  |
| Day 5, n                                                          | 40                                | 44                              |
| Mean (SD)                                                         | 29.8 (11.20)                      | 29.6 (10.39)                    |
| Median (range)                                                    | 28.6 (5.7–64.6)                   | 30.1 (8.7–52.1)                 |
| Day 8, n                                                          | 41                                | 42                              |
| Mean (SD)                                                         | 2.6 (5.30)                        | 2.6 (3.40)                      |
| Median (range)                                                    | 1.0 (0.1–32.7)                    | 0.9 (0.1–14.9)                  |
| Day 10, n                                                         | 38                                | 42                              |
| Mean (SD)                                                         | 2.3 (2.51)                        | 1.5 (2.27)                      |
| Median (range)                                                    | 1.3 (0.1–9.5)                     | 0.9 (0.0–11.5)                  |
| Day 12, n                                                         | 39                                | 43                              |
| Mean (SD)                                                         | 8.4 (6.36)                        | 4.8 (3.45)                      |
| Median (range)                                                    | 6.3 (1.4–32.6)                    | 4.0 (0.0–15.9)                  |
| Day 15, n                                                         | 40                                | 43                              |
| Mean (SD)                                                         | 10.1 (4.47)                       | 7.5 (3.95)                      |
| Median (range)                                                    | 9.6 (2.5–22.9)                    | 6.5 (1.7–18.1)                  |

SD, standard deviation

**Supplementary Table S3.** Overview of adverse events (safety population)

| <b>Number of patients, <i>n</i> (%)</b>                     | <b>Lipegfilgrastim<br/>(N=46)</b> | <b>Pegfilgrastim<br/>(N=50)</b> | <b>Total<br/>(N=96)</b> |
|-------------------------------------------------------------|-----------------------------------|---------------------------------|-------------------------|
| At least 1 AE                                               | 45 (98)                           | 49 (98)                         | 94 (98)                 |
| Individual AEs reported by ≥30% of subjects in either group |                                   |                                 |                         |
| Constipation                                                | 18 (39)                           | 16 (32)                         | 34 (35)                 |
| Anemia                                                      | 13 (28)                           | 20 (40)                         | 33 (34)                 |
| Neutropenia                                                 | 17 (37)                           | 15 (30)                         | 32 (33)                 |
| Alopecia                                                    | 16 (35)                           | 13 (26)                         | 29 (30)                 |
| Nausea                                                      | 10 (22)                           | 19 (38)                         | 29 (30)                 |
| Fatigue                                                     | 12 (26)                           | 16 (32)                         | 28 (29)                 |
| Diarrhea                                                    | 9 (20)                            | 16 (32)                         | 25 (26)                 |
| At least 1 treatment-related AE                             | 11 (24)                           | 10 (20)                         | 21 (22)                 |
| At least 1 SAE                                              | 21 (46)                           | 23 (46)                         | 44 (46)                 |
| At least 1 treatment-related SAE                            | 0                                 | 0                               | 0                       |
| At least 1 AE leading to withdrawal from the study          | 1 (2)                             | 9 (18)                          | 10 (10)                 |
| At least 1 AE leading to death*                             | 2 (4)                             | 5 (10)                          | 7 (7)                   |

AE, adverse event; SAE, serious adverse event.

\*Causes of death were general physical health deterioration (1 patient) and NHL (1 patient) in the lipegfilgrastim group, and NHL (3 patients), diffuse large B-cell lymphoma (1 patient) and coma (1 patient) in the pegfilgrastim group. One patient randomized to lipegfilgrastim died before starting study treatment.
